# Supplementary material
Source: MDPI journal article supplement (https://www.mdpi.com/2312-7481/8/12/162)
Supplement: s1 [file s1]

Supporting Information  
for  
The Halogen Effect on the Magnetic Behaviour of Dimethylformamide  
Solvates in  
[Fe(halide-salEen)<sub>2</sub>]BPh<sub>4</sub>

Rafaela T. Marques <sup>1</sup>, Frederico F. Martins <sup>2,†</sup>, Deniz F. Bekiş <sup>2,†</sup>, Ana I. Vicente <sup>1</sup>, Liliana P. Ferreira <sup>2,3</sup>, Clara S. B. Gomes <sup>4,5,6</sup>, Sónia Barroso <sup>5,6,‡</sup>, Varun Kumar <sup>7</sup>, Yann Garcia <sup>7</sup>, Nuno A. G. Bandeira <sup>2</sup>, Maria José Calhorda <sup>2</sup> and Paulo N. Martinho <sup>1,\*</sup>

<sup>1</sup> Centro de Química Estrutural, Institute of Molecular Sciences, Departamento de Química e Bioquímica, Faculdade de Ciências, Universidade de Lisboa, Campo Grande, 1749-016 Lisboa, Portugal

<sup>2</sup> BioISI—Biosystems & Integrative Sciences Institute, Departamento de Química e Bioquímica, Faculdade de Ciências, Universidade de Lisboa, Campo Grande, 1749-016 Lisboa, Portugal;

<sup>3</sup> Department of Physics, University of Coimbra, 3004-516 Coimbra, Portugal

<sup>4</sup> LAQV-REQUIMTE, Departamento de Química, Faculdade de Ciências e Tecnologia, Universidade NOVA de Lisboa, 2829-516 Caparica, Portugal

<sup>5</sup> UCIBIO, Departamento de Química, Faculdade de Ciências e Tecnologia, Universidade NOVA de Lisboa, 2829-516 Caparica, Portugal

<sup>6</sup> i4HB, Faculdade de Ciências e Tecnologia, Universidade NOVA de Lisboa, 2829-516 Caparica, Portugal

<sup>7</sup> Institute of Condensed Matter and Nanosciences, Molecular Chemistry, Materials and Catalysis (IMCN/MOST), Université Catholique de Louvain, Place L. Pasteur 1, 1348 Louvain-la-Neuve, Belgium

<sup>†</sup> Current address: IQCC & Dept. Química, Universitat de Girona, Campus Montilivi (Ciències), 17003 Girona, Spain.

<sup>‡</sup> Current address: Anorganische Chemie, Fachbereich Chemie, Philipps-Universität Marburg, Hans-Meerwein-Straße 4, 35032 Marburg

<sup>‡</sup> Current address: MARE – Marine and Environmental Sciences Centre / ARNET - Aquatic Research Network, Polytechnic of Leiria, Cetemares, 2520-620 Peniche, Portugal

## Contents

|            | Title                                                                                                                                                                                                                                                         | Page |
|------------|---------------------------------------------------------------------------------------------------------------------------------------------------------------------------------------------------------------------------------------------------------------|------|
| Table S1   | Crystallographic data and refinement details for structures <b>1</b> and <b>3</b> at 150(2) K.                                                                                                                                                                | 3    |
| Figure S1  | ORTEP-3 diagram of <b>1</b> (150K), using 30% probability level ellipsoids. Hydrogen atoms are omitted for clarity.                                                                                                                                           | 4    |
| Figure S2  | ORTEP-3 diagram of <b>3</b> (150K), using 30% probability level ellipsoids. Hydrogen atoms are omitted for clarity.                                                                                                                                           | 4    |
| Table S2   | Hydrogen bonds for complexes <b>1</b> , <b>2</b> and <b>3</b> at room temperature [ $\text{\AA}$ and $^\circ$ ].                                                                                                                                              | 5    |
| Figure S3  | Crystal packing of <b>3</b> displaying the hydrogen bonds between the DMF solvent molecule and the NH groups of the cation, observed at 150 K. Light-blue dashed lines and dark blue dashed lines represent N–H...O and C–H...O hydrogen bonds, respectively. | 5    |
| Figure S4  | Unit cell of complex <b>2</b> showing $\pi$ – $\pi$ stacking in a dashed blue line.                                                                                                                                                                           | 6    |
| Figure S5  | Unit cell of complex <b>3</b> showing $\pi$ – $\pi$ stacking in a dashed blue line.                                                                                                                                                                           | 6    |
| Figure S6  | Unit cell of complex <b>3</b> (150 K) showing $\pi$ – $\pi$ stacking in a dashed blue line.                                                                                                                                                                   | 7    |
| Figure S7  | Crystal packing of <b>2</b> ; view along the crystallographic direction <i>a</i> with atoms of BPh <sub>4</sub> <sup>–</sup> anions drawn as spheres showing the formation of consecutive rows.                                                               | 7    |
| Figure S8  | Crystal packing of <b>3</b> at room temperature: view along the crystallographic direction <i>a</i> with atoms of BPh <sub>4</sub> <sup>–</sup> anions drawn as spheres showing the formation of consecutive rows.                                            | 8    |
| Figure S9  | Crystal packing of <b>3</b> at 150 K: view along the crystallographic direction <i>a</i> with atoms of BPh <sub>4</sub> <sup>–</sup> anions drawn as spheres showing the formation of consecutive rows.                                                       | 8    |
| Table S3   | Relevant distances ( $\text{\AA}$ ) calculated (ADF, B3LYP*/TZP) for the three molecular models (CA, CS, CAS) of complexes <b>1</b> (Br), <b>2</b> (Cl), <b>3</b> (F) and their iodine ( <b>4</b> ) analogue ( $\text{\AA}$ ) and experimental ones (bold).   | 9    |
| Table S4   | Relevant distances ( $\text{\AA}$ ) for the calculated for the two periodic models (CAS, CA) and supercell (CA) of complexes <b>1</b> (Br), <b>2</b> (Cl), <b>3</b> (F) and their iodine ( <b>4</b> ) analogue ( $\text{\AA}$ ) and experimental ones (bold). | 10   |
| Figure S10 | Optimised molecular structures of the three models of <b>3</b> : CAS (top), CS (middle), CA (bottom).                                                                                                                                                         | 11   |
| Figure S11 | Energy difference between spin states ( $\Delta E_{\text{HS-LS}}$ / $\text{kJ mol}^{-1}$ ) for all the periodic and molecular DFT calculations of complexes <b>1</b> (Br), <b>2</b> (Cl), <b>3</b> (F), and <b>4</b> (I).                                     | 12   |

**Table S1.** Crystallographic data and refinement details for complexes **1** and **3** at 150(2) K.

|                                                    | <b>1</b> (150 K)                                                                  | <b>3</b> (150 K)                                                                |
|----------------------------------------------------|-----------------------------------------------------------------------------------|---------------------------------------------------------------------------------|
| Formula                                            | C <sub>49</sub> H <sub>55</sub> BBBr <sub>2</sub> FeN <sub>5</sub> O <sub>3</sub> | C <sub>52</sub> H <sub>62</sub> BF <sub>2</sub> FeN <sub>6</sub> O <sub>4</sub> |
| Molar mass / g·mol <sup>-1</sup>                   | 988.46                                                                            | 939.73                                                                          |
| $\lambda$ / Å                                      | 0.71073                                                                           | 0.71073                                                                         |
| Crystal system                                     | Orthorhombic                                                                      | Monoclinic                                                                      |
| Space group[25]                                    | <i>P</i> 2 <sub>1</sub> 2 <sub>1</sub> 2 <sub>1</sub>                             | <i>P</i> 2 <sub>1</sub> / <i>n</i>                                              |
| <i>a</i> / Å                                       | 15.6150(12)                                                                       | 14.401(6)                                                                       |
| <i>b</i> / Å                                       | 15.0250(12)                                                                       | 18.570(7)                                                                       |
| <i>c</i> / Å                                       | 19.8280(16)                                                                       | 19.138(8)                                                                       |
| $\beta$ / °                                        | 90                                                                                | 107.239(9)                                                                      |
| <i>V</i> (Å <sup>3</sup> )                         | 4652.0(6)                                                                         | 4888(3)                                                                         |
| <i>Z</i>                                           | 4                                                                                 | 4                                                                               |
| $\rho_{calc}$ / g·cm <sup>-3</sup>                 | 1.411                                                                             | 1.277                                                                           |
| $\mu$ / mm <sup>-1</sup>                           | 2.089                                                                             | 0.367                                                                           |
| Crystal size / mm                                  | 0.30 x 0.25 x 0.20                                                                | 0.30 x 0.20 x 0.16                                                              |
| Crystal colour                                     | Brown                                                                             | Red                                                                             |
| Crystal description                                | Block                                                                             | Prism                                                                           |
| $\theta_{max}$ / °                                 | 25.240                                                                            | 25.350                                                                          |
| No. of reflections                                 | 55132                                                                             | 65384                                                                           |
| No. of unique reflections                          | 8264                                                                              | 8932                                                                            |
| <i>R</i> <sub>int</sub>                            | 0.0934                                                                            | 0.4023                                                                          |
| <i>R</i> <sub>1</sub> [ <i>I</i> > 2σ( <i>I</i> )] | 0.0375                                                                            | 0.1203                                                                          |
| <i>wR</i> <sub>2</sub> (all data)                  | 0.0712                                                                            | 0.3018                                                                          |
| GooF (all data)                                    | 1.005                                                                             | 1.011                                                                           |
| $\rho_{min}$                                       | -0.501                                                                            | -0.962                                                                          |
| $\rho_{max}$                                       | 0.404                                                                             | 0.897                                                                           |

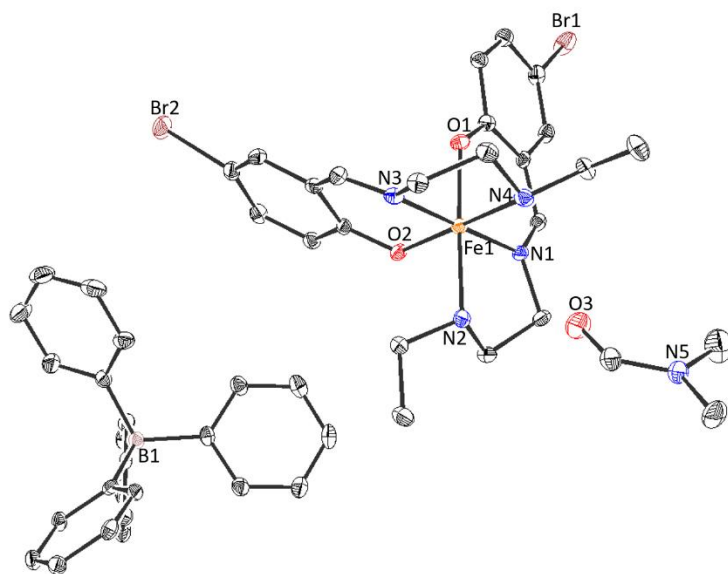

**Figure S1.** ORTEP-3 diagram of **1** (150 K), using 30% probability level ellipsoids. Hydrogen atoms are omitted for clarity.

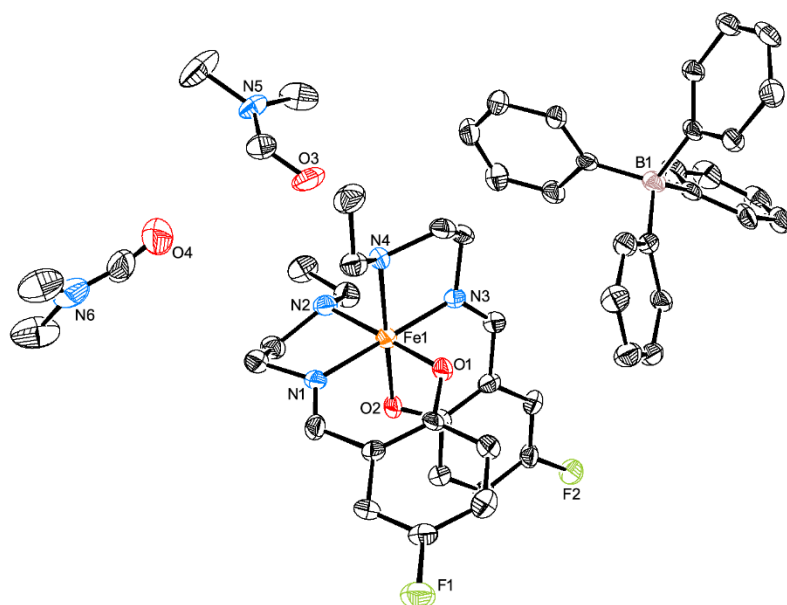

**Figure S2.** ORTEP-3 diagram of complex **3** (150 K), using 30% probability level ellipsoids. Hydrogen atoms are omitted for clarity.

**Table S2.** Hydrogen bonds for complexes **1**, **2**, and **3** at room temperature in Å and °.

|                  | D-H...A       | d(H...A) | d(D...A)  | <(DHA) |
|------------------|---------------|----------|-----------|--------|
| <b>1</b>         | N2–H1...O3    | 2.21(5)  | 2.947(8)  | 177(5) |
|                  | N4–H3...O3    | 2.08(6)  | 2.943(7)  | 165(5) |
| <b>1</b> (150 K) | N2–H2...O3    | 1.92(5)  | 2.882(8)  | 160(5) |
|                  | N4–H4...O3    | 2.03(6)  | 2.870(10) | 164(7) |
| <b>2</b>         | N2–H1...O3    | 2.01(4)  | 2.913(5)  | 156(4) |
|                  | N4–H3...O3    | 1.91(4)  | 2.874(5)  | 168(5) |
| <b>3</b>         | N2–H1...O3    | 2.14(4)  | 2.952(6)  | 169(3) |
|                  | N4–H4...O3    | 2.21(4)  | 2.977(5)  | 166(3) |
| <b>3</b> (150 K) | N2–H2...O3    | 2.08(4)  | 2.914(5)  | 163(4) |
|                  | N4–H4...O3    | 2.62(5)  | 2.901(6)  | 160(4) |
|                  | C4–H4A...O4   | 2.54     | 3.406(14) | 146    |
|                  | C47–H47A...O4 | 2.39     | 3.108(15) | 132    |

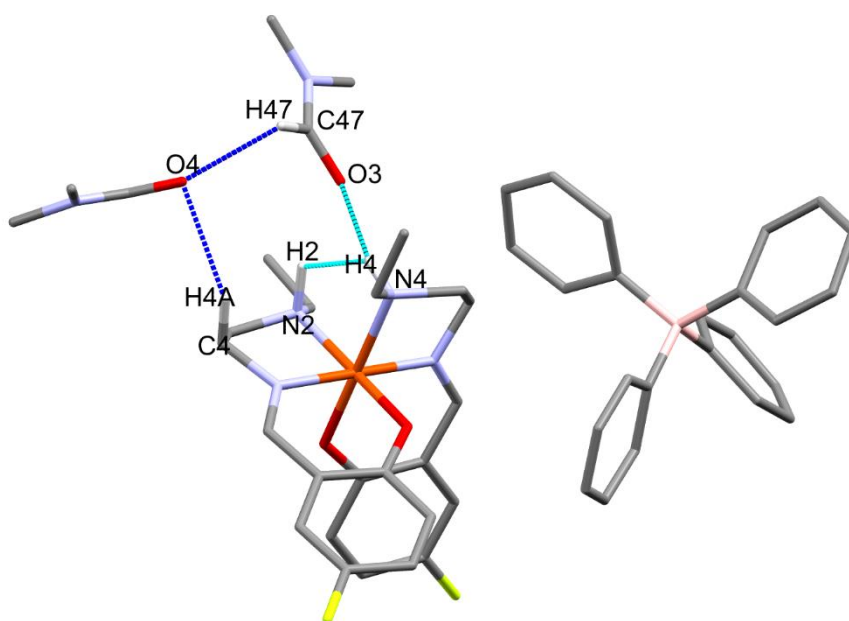

**Figure S3.** Crystal packing of complex **3** displaying the hydrogen bonds between the DMF solvent molecule and the NH groups of the cation, observed at 150 K. Light-blue dashed lines and dark blue dashed lines represent N–H...O and C–H...O hydrogen bonds, respectively.

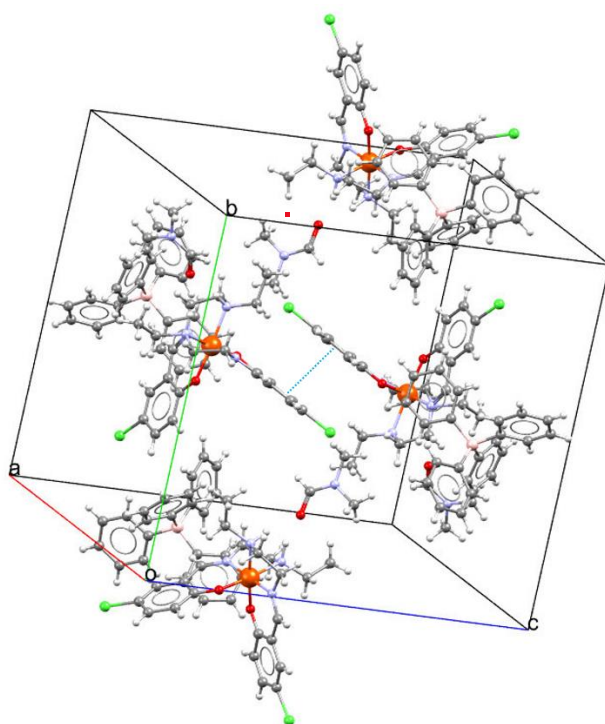

**Figure S4.** Unit cell of complex **2** showing  $\pi$ - $\pi$  stacking in a dashed blue line.

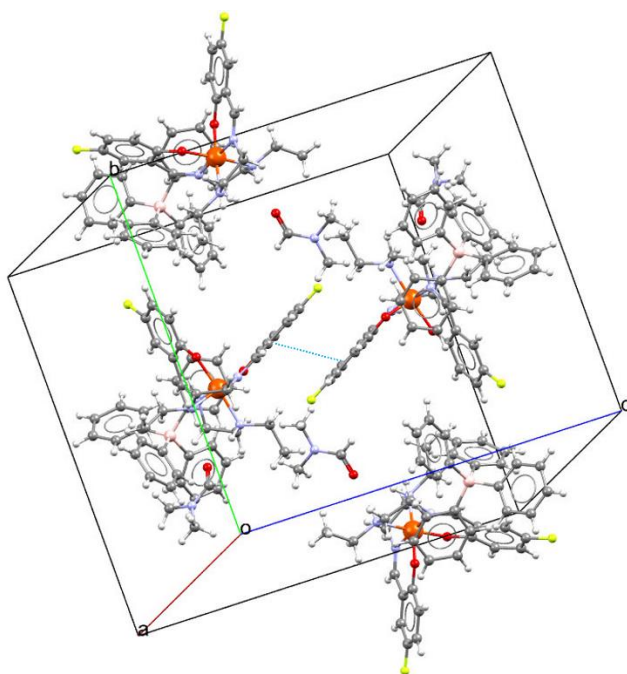

**Figure S5.** Unit cell of complex **3** showing  $\pi$ - $\pi$  stacking in a dashed blue line.

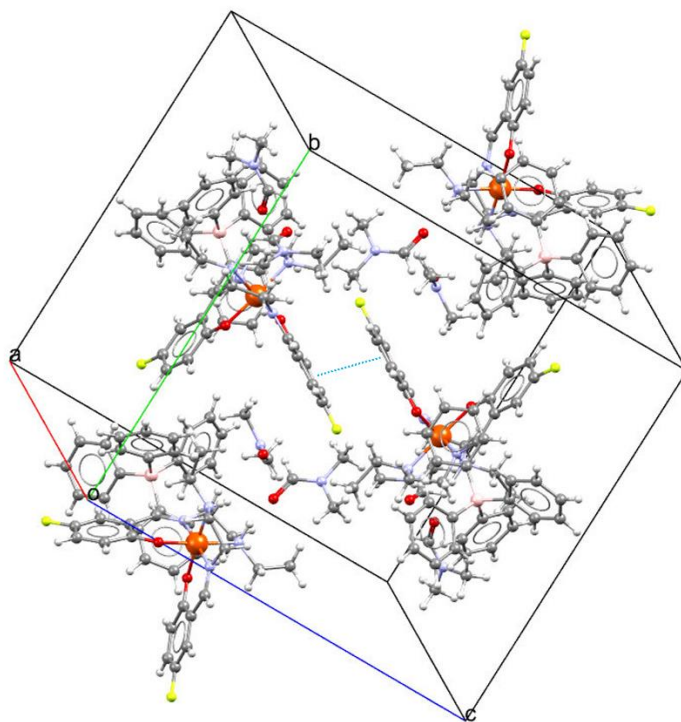

**Figure S6.** Unit cell of complex **3** (150 K) showing  $\pi$ - $\pi$  stacking in a dashed blue line.

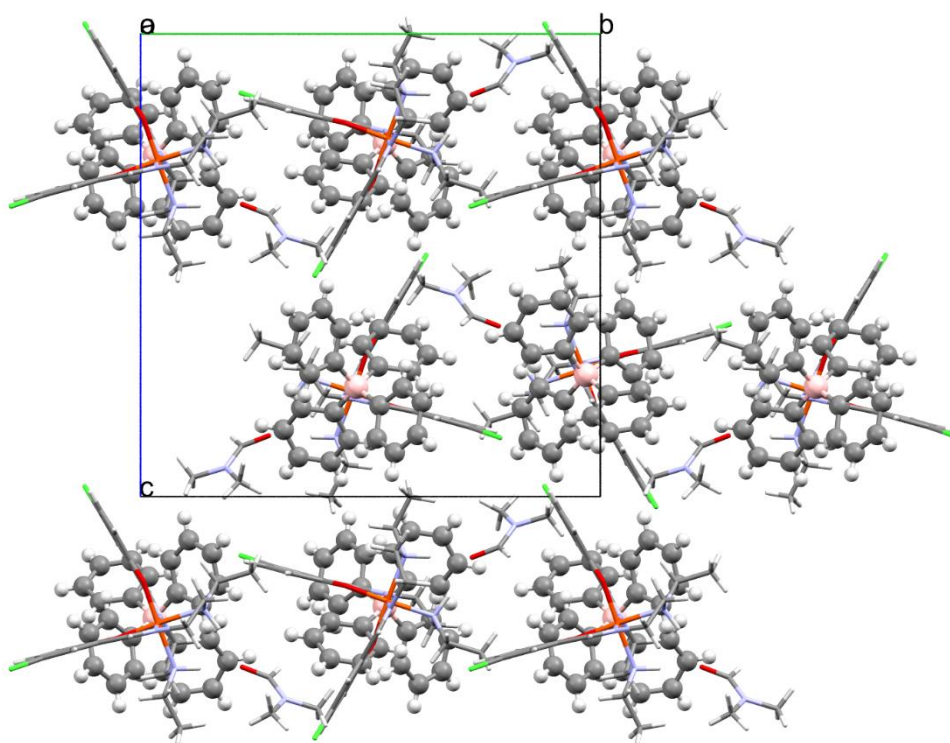

**Figure S7.** Crystal packing of complex **2** viewed along the crystallographic direction *a* with atoms of BPh<sub>4</sub><sup>-</sup> anions drawn as spheres showing the formation of consecutive rows.



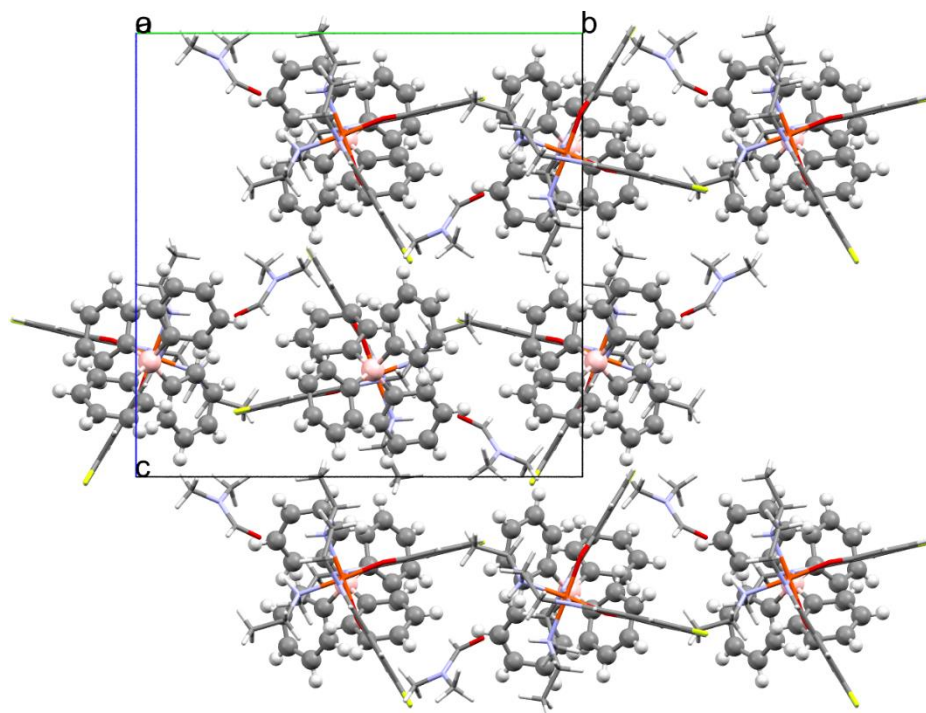

**Figure S8.** Crystal packing of complex **3** at room temperature viewed along the crystallographic direction *a* with atoms of BPh<sub>4</sub><sup>−</sup> anions drawn as spheres showing the formation of consecutive rows.

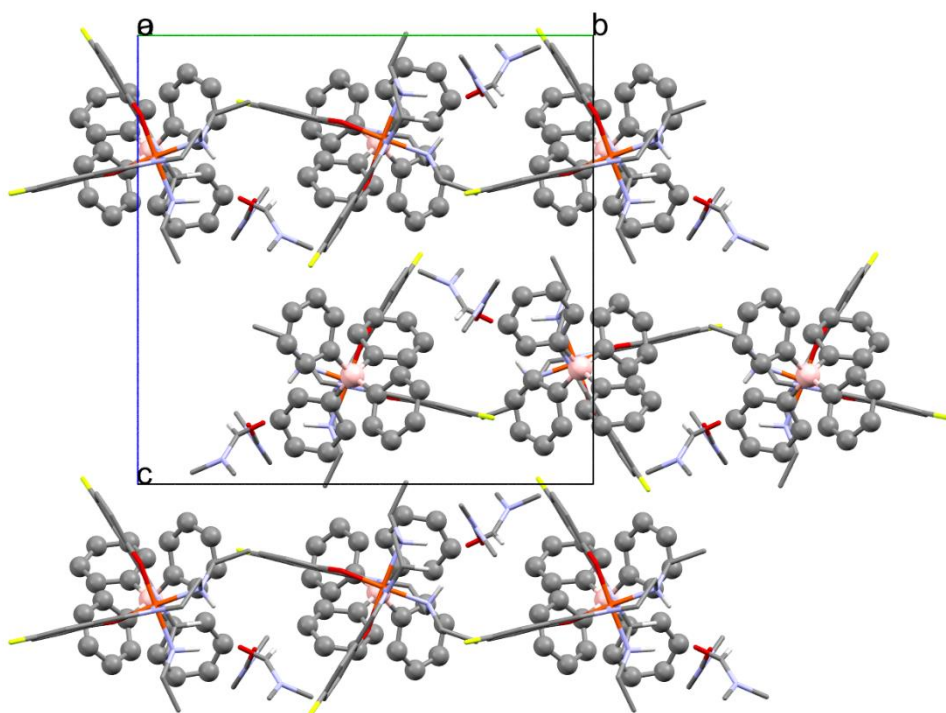

**Figure S9.** Crystal packing of complex **3** at 150 K viewed along the crystallographic direction *a* with atoms of BPh<sub>4</sub><sup>−</sup> anions drawn as spheres showing the formation of consecutive rows.



**Table S3.** Relevant distances (Å) calculated (ADF, B3LYP\*/TZP) for the three molecular models (CA, CS, CAS) of complexes **1** (Br), **2** (Cl), **3** (F) and their iodine (**4**) analogue (Å) and experimental ones (bold).

| Bond               | CAS model |        | Exp<br>150 K | RT           | CA model |       | CS model |       |
|--------------------|-----------|--------|--------------|--------------|----------|-------|----------|-------|
|                    | LS        | HS     |              |              | LS       | HS    | LS       | HS    |
| <b>1 (Br)</b>      |           |        |              |              |          |       |          |       |
| Fe-O               | 1.918     | 1.953  | <b>1.867</b> | <b>1.880</b> | 1.919    | 1.944 | 1.911    | 1.934 |
|                    | 1.922     | 1.956  | <b>1.878</b> | <b>1.870</b> | 1.922    | 1.948 | 1.912    | 1.937 |
| Fe-N <sub>im</sub> | 1.979     | 2.148  | <b>1.919</b> | <b>1.923</b> | 1.982    | 2.149 | 1.982    | 2.152 |
|                    | 1.980     | 2.151  | <b>1.917</b> | <b>1.930</b> | 1.986    | 2.163 | 1.983    | 2.154 |
| Fe-N <sub>am</sub> | 2.119     | 2.306  | <b>2.021</b> | <b>2.050</b> | 2.128    | 2.296 | 2.135    | 2.310 |
|                    | 2.131     | 2.309  | <b>2.049</b> | <b>2.020</b> | 2.128    | 2.296 | 2.138    | 2.319 |
| <b>2 (Cl)</b>      |           |        |              |              |          |       |          |       |
| Fe-O               | 1.918     | 1.974  | -            | <b>1.866</b> | 1.919    | 1.971 | 1.911    | 1.962 |
|                    | 1.922     | 1.979  |              | <b>1.866</b> | 1.922    | 1.976 | 1.912    | 1.965 |
| Fe-N <sub>im</sub> | 1.979     | 2.174  | -            | <b>1.926</b> | 1.982    | 2.170 | 1.982    | 2.173 |
|                    | 1.980     | 2.176  |              | <b>1.925</b> | 1.987    | 2.185 | 1.983    | 2.174 |
| Fe-N <sub>am</sub> | 2.120     | 2.305  | -            | <b>2.052</b> | 2.126    | 2.307 | 2.136    | 2.322 |
|                    | 2.131     | 2.313  |              | <b>2.031</b> | 2.129    | 2.313 | 2.137    | 2.326 |
| <b>3 (F)</b>       |           |        |              |              |          |       |          |       |
| Fe-O               | 1.914     | 1.963, | <b>1.856</b> | <b>1.883</b> | 1.913    | 1.962 | 1.901    | 1.959 |
|                    | 1.917     | 1.975  | <b>1.873</b> | <b>1.891</b> | 1.914    | 1.977 | 908      | 1.961 |
| Fe-N <sub>im</sub> | 1.977     | 2.159  | <b>1.897</b> | <b>1.950</b> | 1.976    | 2.164 | 1.980    | 2.165 |
|                    | 1.978     | 2.185  | <b>1.897</b> | <b>1.949</b> | 1.980    | 2.173 | 1.981    | 2.166 |
| Fe-N <sub>am</sub> | 2.121     | 2.274  | <b>2.028</b> | <b>2.061</b> | 2.132    | 2.333 | 2.134    | 2.316 |
|                    | 2.129     | 2.316  | <b>2.019</b> | <b>2.083</b> | 2.121    | 2.294 | 2.137    | 2.319 |
| <b>4 (I)</b>       |           |        |              |              |          |       |          |       |
| Fe-O               | 1.919     | 1.977  | -            | -            | 1.921    | 1.972 | 1.911    | 1.962 |
|                    | 1.923     | 1.981  |              |              | 1.922    | 1.976 | 1.915    | 1.964 |
| Fe-N <sub>im</sub> | 1.980     | 2.174  | -            | -            | 1.982    | 2.174 | 1.983    | 2.176 |
|                    | 1.981     | 2.178  |              |              | 1.985    | 2.185 | 1.985    | 2.178 |
| Fe-N <sub>am</sub> | 2.122     | 2.306  | -            | -            | 2.131    | 2.307 | 2.132    | 2.319 |
|                    | 2.133     | 2.311  |              |              | 2.132    | 2.315 | 2.141    | 2.329 |

**Table S4.** Relevant distances (Å) for the calculated for the two periodic models (CAS, CA) and supercell (CA) of complexes **1** (Br), **2** (Cl), **3** (F) and their iodine (**4**) analogue (Å) and experimental ones (bold).

| Bond               | Crystal |       | Exp          |              | Cation-anion |       | Super cell |       |
|--------------------|---------|-------|--------------|--------------|--------------|-------|------------|-------|
|                    | LS      | HS    | 150 K        | RT           | LS           | HS    | LS         | HS    |
| <b>1 (Br)</b>      |         |       |              |              |              |       |            |       |
| Fe-O               | 1.884   | 1.937 | <b>1.867</b> | <b>1.880</b> | 1.875        | 1.957 | 1.876      | 1.974 |
|                    | 1.899   | 1.974 | <b>1.878</b> | <b>1.870</b> | 1.891        | 1.926 | 1.876      | 1.942 |
| Fe-N <sub>im</sub> | 1.906   | 2.101 | <b>1.919</b> | <b>1.923</b> | 1.908        | 2.093 | 1.921      | 2.105 |
|                    | 1.905   | 2.129 | <b>1.917</b> | <b>1.930</b> | 1.908        | 2.125 | 1.925      | 2.107 |
| Fe-N <sub>am</sub> | 2.031   | 2.189 | <b>2.021</b> | <b>2.050</b> | 2.036        | 2.286 | 2.309      | 2.302 |
|                    | 2.054   | 2.259 | <b>2.049</b> | <b>2.020</b> | 2.062        | 2.210 | 2.367      | 2.338 |
| <b>2 (Cl)</b>      |         |       |              |              |              |       |            |       |
| Fe-O               | 1.880   | 1.942 | -            | <b>1.866</b> | 1.874        | 1.931 | 1.883      | 1.944 |
|                    | 1.890   | 1.951 | -            | <b>1.866</b> | 1.877        | 1.944 | 1.884      | 1.959 |
| Fe-N <sub>im</sub> | 1.902   | 2.103 | -            | <b>1.926</b> | 1.910        | 2.101 | 1.904      | 2.067 |
|                    | 1.902   | 2.088 | -            | <b>1.925</b> | 1.906        | 2.080 | 1.909      | 2.112 |
| Fe-N <sub>am</sub> | 2.046   | 2.217 | -            | <b>2.052</b> | 2.055        | 2.343 | 2.070      | 2.303 |
|                    | 2.045   | 2.265 | -            | <b>2.031</b> | 2.048        | 2.249 | 2.074      | 2.325 |
| <b>3 (F)</b>       |         |       |              |              |              |       |            |       |
| Fe-O               | 1.875   | 1.938 | <b>1.856</b> | <b>1.883</b> | 1.875        | 1.926 | 1.898      | 1.964 |
|                    | 1.887   | 1.944 | <b>1.873</b> | <b>1.891</b> | 1.875        | 1.936 | 1.898      | 1.967 |
| Fe-N <sub>im</sub> | 1.902   | 2.091 | <b>1.897</b> | <b>1.950</b> | 1.913        | 2.097 | 1.903      | 2.084 |
|                    | 1.902   | 2.096 | <b>1.897</b> | <b>1.949</b> | 1.910        | 2.095 | 1.899      | 2.088 |
| Fe-N <sub>am</sub> | 2.051   | 2.238 | <b>2.028</b> | <b>2.061</b> | 2.056        | 2.268 | 2.058      | 2.359 |
|                    | 2.043   | 2.246 | <b>2.019</b> | <b>2.083</b> | 2.056        | 2.273 | 2.071      | 2.372 |
| <b>4 (I)</b>       |         |       |              |              |              |       |            |       |
| Fe-O               | 1.899   | 1.976 | -            | -            | 1.890        | 1.930 | 1.809      | 1.930 |
|                    | 1.882   | 1.940 | -            | -            | 1.877        | 1.963 | 1.878      | 1.994 |
| Fe-N <sub>im</sub> | 1.903   | 2.091 | -            | -            | 1.906        | 2.085 | 1.904      | 2.094 |
|                    | 1.903   | 2.119 | -            | -            | 1.907        | 2.117 | 1.909      | 2.103 |
| Fe-N <sub>am</sub> | 2.057   | 2.186 | -            | -            | 2.065        | 2.221 | 2.067      | 2.313 |
|                    | 2.033   | 2.262 | -            | -            | 2.038        | 2.289 | 2.073      | 2.335 |

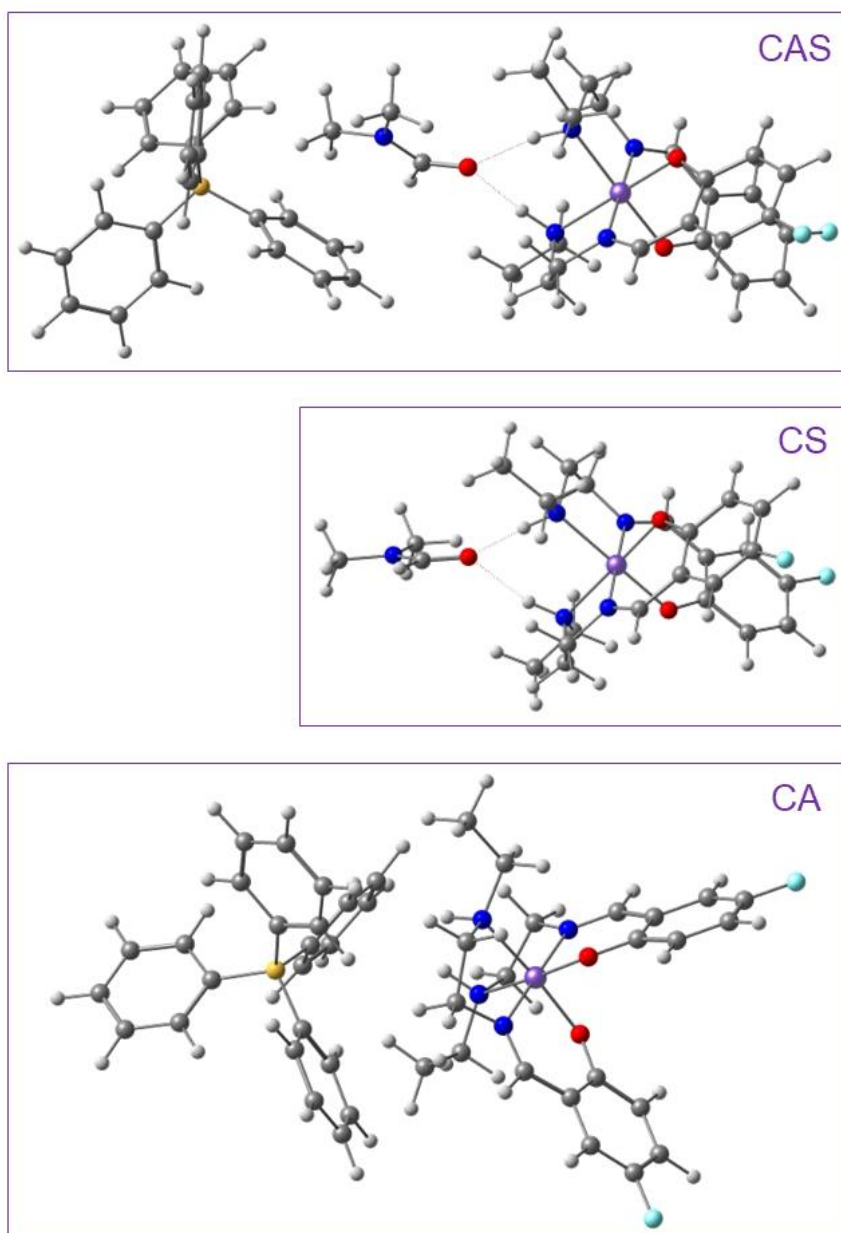

**Figure S10.** Optimized molecular structures of the three models of complex **3**: CAS (top), CS (middle), CA (bottom).

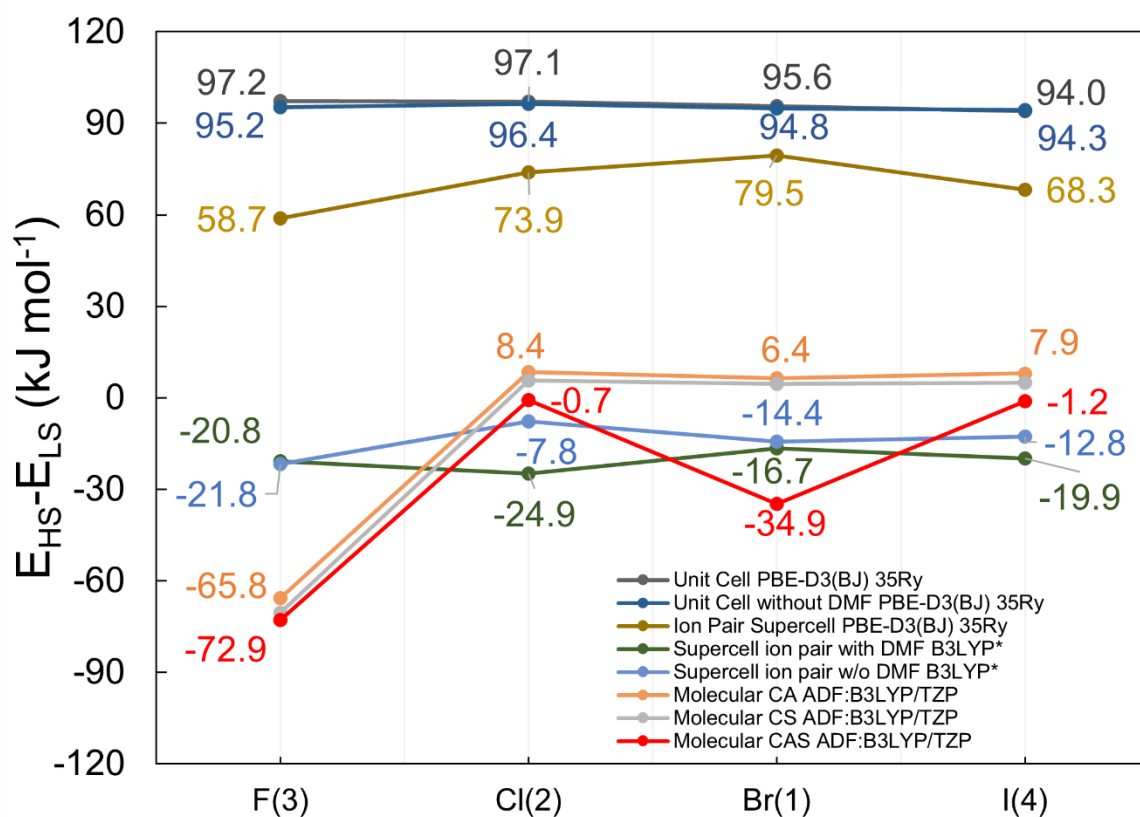

**Figure S11.** Energy difference between spin states ( $\Delta E_{HS-LS}$  /  $\text{kJ mol}^{-1}$ ) for all the periodic and molecular DFT calculations of complexes **1** (Br), **2** (Cl), **3** (F), and **4** (I).
